# Supplementary material for: 7.9% efficient vapor-deposited organic photovoltaic cells based on a simple bulk heterojunction
Source: Royal Society of Chemistry journal article supplement (doi:10.1039/c4ta02137a), 2014-06-26
Supplement: c4ta02137a1.pdf [file c4ta02137a1.pdf]

## **Supplementary Information**

### **Highly efficient vapor-deposited organic photovoltaic cells based on a simple bulk heterojunction**

Yunlong Zou<sup>1</sup>, James Holst,<sup>2</sup> Yong Zhang,<sup>2</sup> and Russell J. Holmes<sup>1,†</sup>

<sup>1</sup>Department of Chemical Engineering and Materials Science

University of Minnesota, Minneapolis, MN, 55455

<sup>2</sup>New Products R&D, Sigma-Aldrich Corporation, 6000 N. Teutonia Ave, Milwaukee, WI 53209

#### **1. Characterization of Indium Tin Oxide (ITO) Substrates:**

##### **Morphology:**

Atomic Force Microscopy (AFM) experiments were carried out on two batches of ITO substrates and the results are shown in Figure 1. ITO batch A was used for all the device optimization experiments and ITO batch B was only used for charge extraction efficiency measurements in Fig. 4a. Based on a 4  $\mu\text{m}^2$  image, the root mean square roughness ( $R_{\text{ms}}$ ) is calculated to be 2.06 nm for batch A and 3.52 nm for batch B.

##### **Sheet Resistance:**

Sheet resistance was measured using the four-point probe method and calculated using Equation 1. The values are listed in Table 1. No significant difference in sheet resistance is observed for these two batches of ITO.

$$R_{\text{sheet}} = \frac{\pi}{\ln 2} \cdot \frac{I}{V} \quad \text{Equation 1}$$

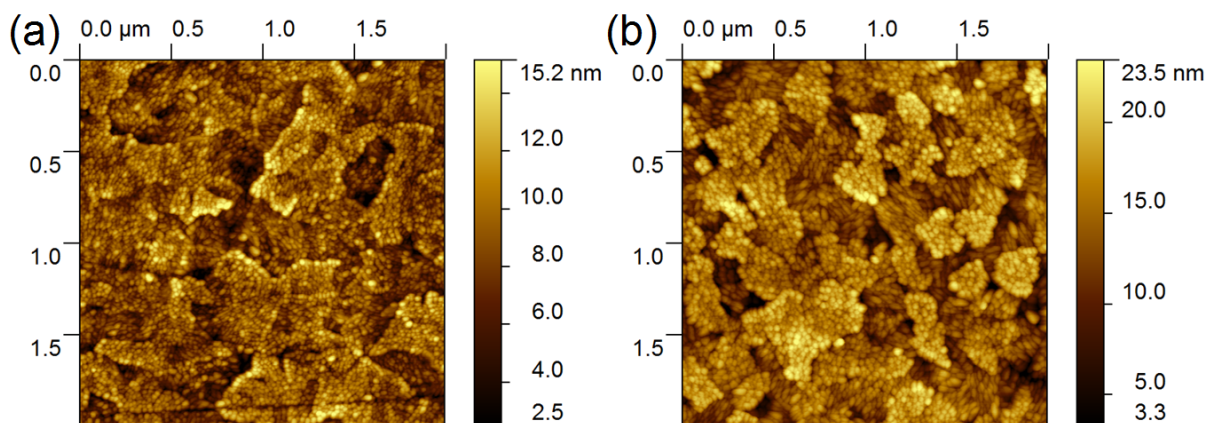

**Figure 1:** Atomic force microscopy images for ITO batch A (a) and B (b).

### Device Performance:

The optimized device structure (70 nm DTDCPB:C<sub>70</sub> = 1:2) was grown on both batches of ITO. All operating parameters are summarized and plotted in Figure 2. Devices fabricated on ITO batch B exhibit higher fill factor (FF), lower short-circuit current ( $J_{SC}$ ) and lower open-circuit voltage ( $V_{OC}$ ) than devices on ITO batch A, but the overall efficiency stays roughly the same. The reduction of  $V_{OC}$  can be explained by the larger  $R_{ms}$  observed in ITO batch B. A rougher ITO substrate may lead to a less uniform organic film grown on top of it, possibly causing local hot spots with high dark current which reduces  $V_{OC}$ .

Series resistance of devices grown on different batches of ITOs are calculated by fitting the dark current with generalized Shockley equations and listed in Table 1.<sup>1</sup> Devices grown on ITO batch B show a >40 % reduction in series resistance when compared to devices grown on ITO batch A, albeit the two batches of ITO show roughly the same sheet resistance according to the four-point probe measurement. ITO morphology may play a role in determining  $R_s$ . The difference in  $R_s$  will eventually impact FF, with ITO batch B (with lower  $R_s$ ) showing higher FF.

**Table 1: Morphological and electrical parameters for two batches of ITO substrates**

| ITO Batch | $R_{ms}$ (nm) | Sheet resistance ( $\Omega/\square$ ) | Fitted $R_s$ ( $\Omega\text{cm}^2$ ) |
|-----------|---------------|---------------------------------------|--------------------------------------|
| A         | 2.06          | $9.12\pm 0.53$                        | $0.79\pm 0.06$                       |
| B         | 3.52          | $8.99\pm 0.39$                        | $0.46\pm 0.03$                       |

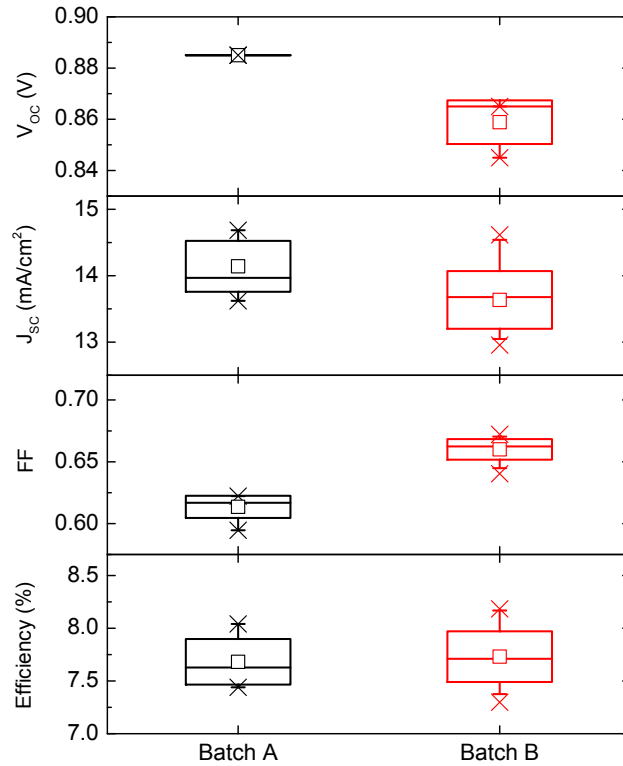

**Figure 2:** Operating parameters for devices fabricated on different batches of ITO, shown as a 5-95 whisker plot and a box plot of standard deviation. The  $\square$  indicates the mean value, and the  $\times$  indicates the maximum or minimum value.

## 2. Dependence of Device Performance on Active Area:

Typical current density-voltage characteristics of devices with the following structure: 10 nm  $\text{MoO}_x$ /70 nm DTDCPB: $\text{C}_{70}$  (1:2)/10 nm BCP/100 nm Al, and an active area of 0.785 mm<sup>2</sup> and 9 mm<sup>2</sup> are plotted in Figure 3. Device operating parameters extracted from the plot are listed in Table 2, containing both the measured and spectral mismatch corrected  $J_{SC}$  and efficiency. The

large-area device shows lower  $V_{OC}$  and  $J_{SC}$  but a higher FF, overall the efficiency stays roughly the same.

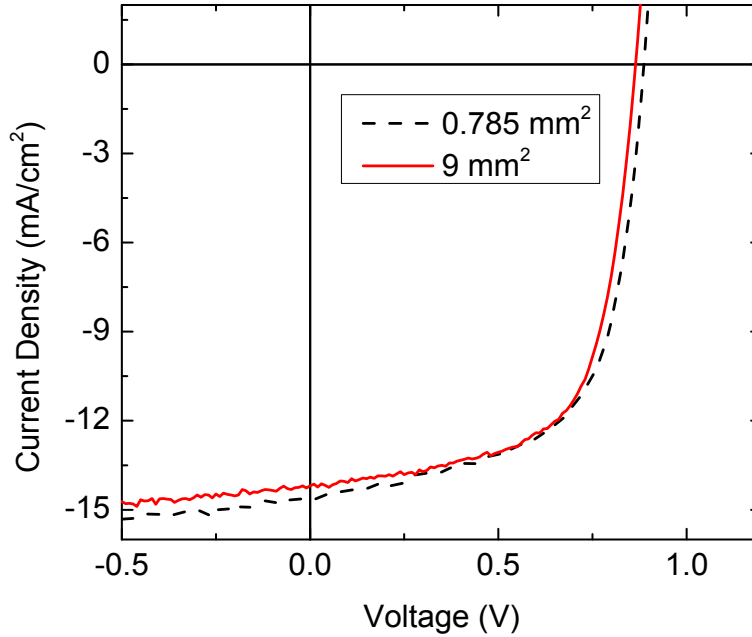

**Figure 3:** Comparison of device performance between large-area device and small-area device under simulated AM 1.5G illumination at 100 mW/cm<sup>2</sup>.

**Table 2: Operating parameters for devices with two different active areas**

| Device Area (mm <sup>2</sup> ) | $V_{OC}$ (V) | $J_{SC}$ (mA/cm <sup>2</sup> ) | $J_{SC}$ Corrected (mA/cm <sup>2</sup> ) | FF   | Efficiency (%) | Efficiency Corrected (%) |
|--------------------------------|--------------|--------------------------------|------------------------------------------|------|----------------|--------------------------|
| 0.785                          | 0.89         | 14.6                           | 14.8                                     | 0.62 | 8.0            | 8.2                      |
| 9                              | 0.86         | 14.2                           | 14.4                                     | 0.65 | 7.9            | 8.1                      |

### 3. MoO<sub>x</sub> film characterization:

A 10-nm-thick MoO<sub>x</sub> film was deposited on Silicon wafer at a rate of 0.05 nm/s and a base pressure of  $<8 \times 10^{-7}$  Torr via thermal evaporation. The MoO<sub>x</sub> film contains mostly Mo<sup>6+</sup> as measured by X-ray photoelectron spectroscopy, as shown in Figure 4.

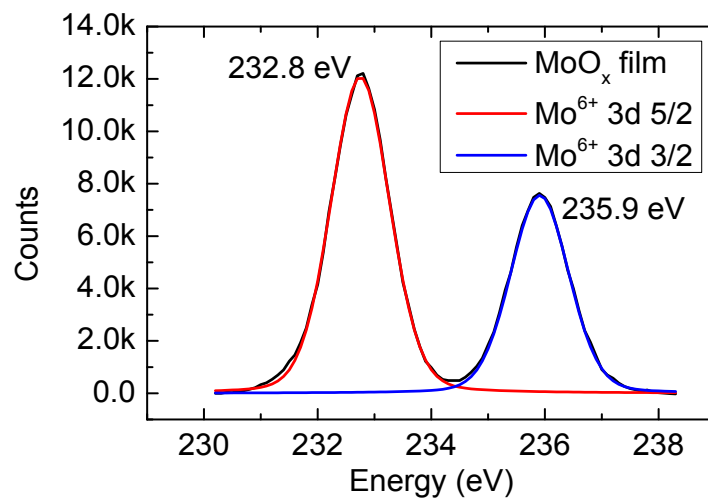

**Figure 4:** XPS spectrum of MoO<sub>x</sub> deposited via thermal evaporation method.

**References:**

1. B. P. Rand, D. P. Burk and S. R. Forrest, *Phys Rev B*, 2007, **75**, 115327.
